# Supplementary material for: Exosome-mediated uptake of mast cell tryptase into the nucleus of melanoma cells: a novel axis for regulating tumor cell proliferation and gene expression
Source: PubMed Central journal article supplement (PMC6736983; doi:10.1038/s41419-019-1879-4), 2019-09-10
Supplement: 41419_2019_1879_MOESM4_ESM.pdf [file 41419_2019_1879_MOESM4_ESM.pdf]

## Z-stack

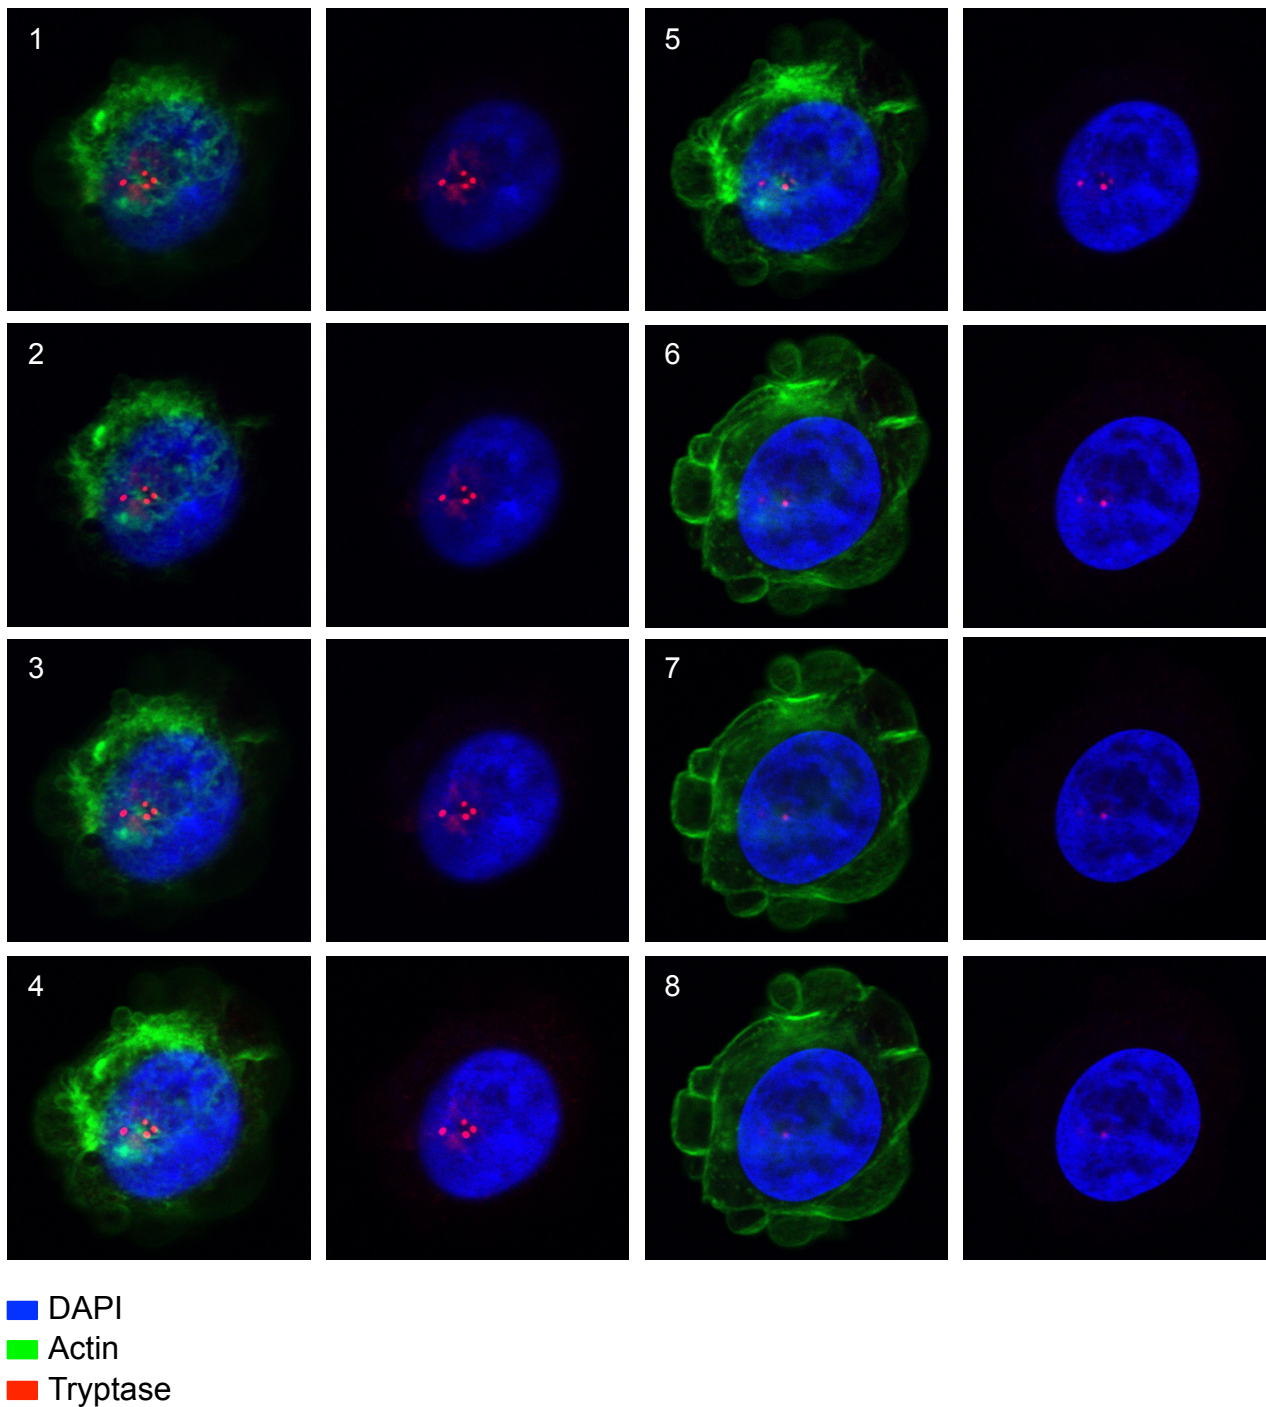

**Suppl. Fig 2. Nuclear localization of human tryptase in melanoma cells.** Human melanoma cells (MEL526) were incubated with 50 nM tryptase overnight, followed by confocal microscopy analysis. The figure shows a Z-stack analysis revealing a nuclear localization of tryptase.
