# Supplementary material for: Exosome-mediated uptake of mast cell tryptase into the nucleus of melanoma cells: a novel axis for regulating tumor cell proliferation and gene expression
Source: PubMed Central journal article supplement (PMC6736983; doi:10.1038/s41419-019-1879-4), 2019-09-10
Supplement: 41419_2019_1879_MOESM7_ESM.pdf [file 41419_2019_1879_MOESM7_ESM.pdf]

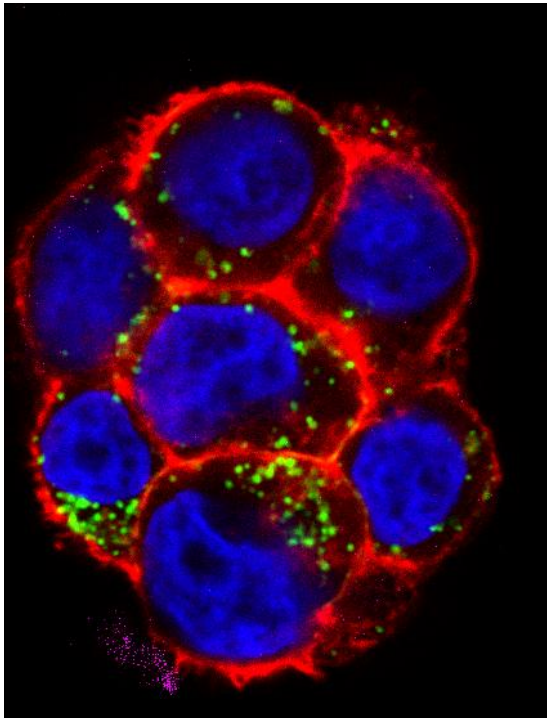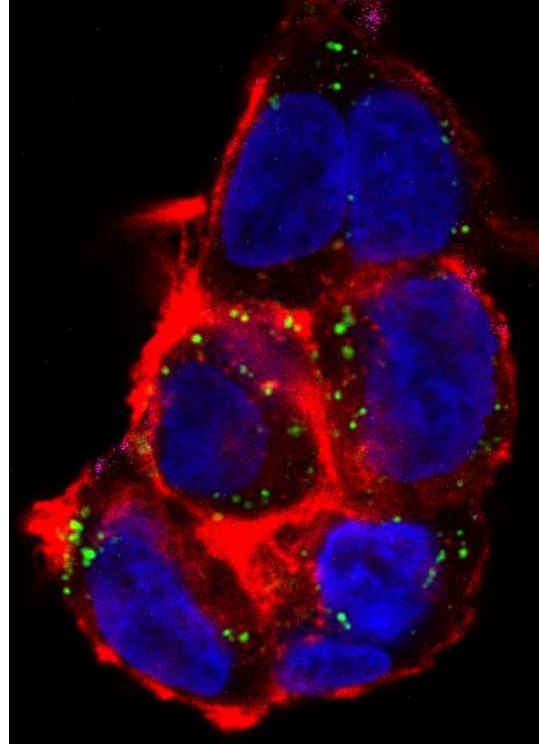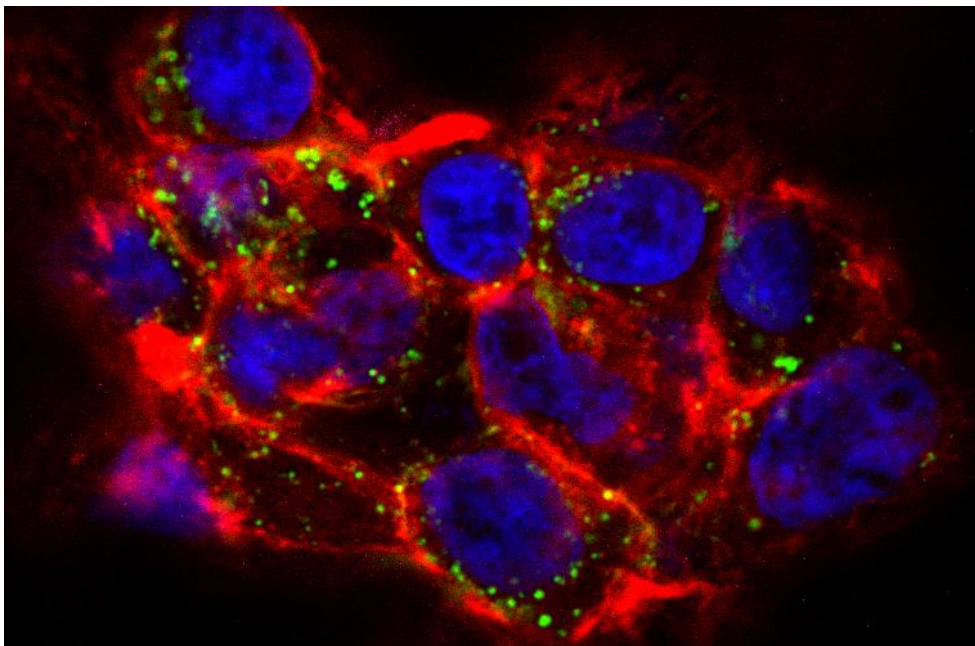

**Suppl. Fig 5. Uptake of exosomes by melanoma cells.** Exosomes were purified from human melanoma cells (MEL526) using the total exosome isolation reagent from cell culture media and were labeled with Wheat Germ Agglutinin (WGA) Alexa™ 488. WGA –labeled exosomes were incubated with melanoma cells overnight. Cells were washed and assessed for uptake of WGA-labeled exosomes.
